# Supplementary material
Source: publisher figshare collection journal article supplement (https://asha.figshare.com/articles/dataset/_/19233462)
Supplement: Supplementary file 1 [file 1]

**Supplemental Material S2.** Published sound pressure levels (SPLs) of leisure time activities associated with noise exposure.

| Activity                                                                           | Equivalent continuous SPLs in dB(A)       | Lowest value        | Highest value            |
|------------------------------------------------------------------------------------|-------------------------------------------|---------------------|--------------------------|
| Riding a moped                                                                     | 82 (Bistrup et al., 2001)<br>(Estimation) | n.d.                | n.d.                     |
| Listening to music (stationary stereos) via loudspeaker                            | 83 (Axelsson et al., 1993; Clark, 1991)   | <80 (Clark, 1991)   | 85 (Clark, 1991)         |
| Listening to music (stationary stereos) via headphones*                            | Median: 77                                | n.d.                | n.d.                     |
| Listening to portable listening devices (PLDs) via headphones (charts, rock, pop)* | Median: 77                                | n.d.                | n.d.                     |
| Listening to portable listening devices (PLDs) via headphones (oldies, jazz)*      | Median: 71                                | n.d.                | n.d.                     |
| Listening to portable listening devices (PLDs) via headphones (classic)*           | Median: 65                                | n.d.                | n.d.                     |
| Playing video games via headphones                                                 | 84 (Axelsson, 1996; Plakke, 1983)         | < 80 (Plakke, 1983) | 92 (Mirbod et al., 1992) |
| Audio books, reports, or sport programs via headphones                             | 80**                                      | n.d.                | n.d.                     |
| Watching movies (e.g., DVDs) via headphones                                        | 80**                                      | n.d.                | n.d.                     |
| Playing an instrument                                                              | 80 - 96                                   | n.d.                | n.d.                     |

| Activity                                                                | Equivalent continuous SPLs in dB(A)                                              | Lowest value                   | Highest value                             |
|-------------------------------------------------------------------------|----------------------------------------------------------------------------------|--------------------------------|-------------------------------------------|
|                                                                         | depending on type of instrument (Hohmann, 2000, 2010) (Supplemental Material S1) |                                |                                           |
| Playing in a band or in an orchestra or singing, playing music together | 95 (McIlvaine et al., 2012)                                                      | 90 (Hohmann, 2000) (Orchestra) | 100 (Hohmann, 2000) (Rock and jazz music) |
| Cinema visits                                                           | < 80 (Ferguson et al., 2000)                                                     | n.d.                           | 80 (Warszawa & Sataloff, 2010)            |
| Attendance at classic concerts or operas                                | 80 (Lebo & Oliphant, 1968)**                                                     | n.d.                           | n.d.                                      |
| Attendance at rock, pop, or jazz concerts                               | 98.5 (Derebery et al., 2012)                                                     | 96 (Clark, 1991)               | 99 (Opperman et al., 2006)                |
| Attendance at discotheques                                              | 100 (Twardella et al., 2008)                                                     | n.d.                           | n.d.                                      |
| Attendance at sport events in a stadium (e.g., soccer game)             | 97 (Axelsson, 1996)                                                              | 93 (Beach et al., 2013)        | 100 (Swanepoel & Hall, 2010)              |
| Practicing ball sports in a sports hall                                 | 91 (Jiang, 1997)                                                                 | 80**                           | n.d.                                      |
| Home handyman works, noisy home tools                                   | 85 (Bistrup et al., 2001)                                                        | 80 (Bistrup et al., 2001)      | n.d.                                      |

*Note.* n.d. = No deviation from conventional value; < 80 = Values were not considered in further analysis.

\*SPLs were allocated according to the participant data on their typical volume setting of PMPs. According to Hohmann (2010), 6 dB were subtracted from the value listening to charts, rock, pop for the value listening to jazz/oldies, and 12dB subtracted for listening to classic.

\*\*SUVA (Swiss Accident Insurance Institute) assessment

## References

- Axelsson, A.** (1996). Recreational exposure to noise and its effects. *Noise Control Engineering Journal*, 44(3), 127-134.
- Axelsson, A., Dengerink, H., Hellstrom, P. A., & Mossberg, A. M.** (1993). The sound world of the child. The relationship between daily activities and hearing acuity. *Scandinavian Audiology*, 22(2), 117-124.  
[http://www.ncbi.nlm.nih.gov/entrez/query.fcgi?cmd=Retrieve&db=PubMed&dopt=Citation&list\\_uids=8321996](http://www.ncbi.nlm.nih.gov/entrez/query.fcgi?cmd=Retrieve&db=PubMed&dopt=Citation&list_uids=8321996)
- Beach, E., Williams, W., & Gilliver, M.** (2013). Estimating young Australian adults' risk of hearing damage from selected leisure activities [Research Support, Non-U.S. Gov't]. *Ear and Hearing*, 34(1), 75-82. <https://doi.org/10.1097/AUD.0b013e318262ac6c>
- Bistrup, M., Hygge, S., Keiding, L., & Passchier-Vermeer, W. (2001). *Health effects of noise on children and perception of the risk of noise* (M. Bistrup, Ed.). National Institute of Public Health, Denmark.
- Clark, W.** (1991). Noise exposure from leisure activities: a review. *The Journal of the Acoustical Society of America*, 90(1), 175-181.  
[http://www.ncbi.nlm.nih.gov/entrez/query.fcgi?cmd=Retrieve&db=PubMed&dopt=Citation&list\\_uids=1880286](http://www.ncbi.nlm.nih.gov/entrez/query.fcgi?cmd=Retrieve&db=PubMed&dopt=Citation&list_uids=1880286)
- Derebery, M. J., Vermiglio, A., Berliner, K. I., Potthoff, M., & Holguin, K.** (2012). Facing the music: pre- and postconcert assessment of hearing in teenagers. *Otology & Neurotology*, 33(7), 1136-1141. <https://doi.org/10.1097/MAO.0b013e31825f2328>
- Ferguson, M. A., Davis, A. C., & Lovell, E. A.** (2000). Cinemas - do they pose a risk to hearing? *Noise Health*, 2(8), 55-58.
- Hohmann, B. (2000). *Musik und Hörschäden* (24 ed.). SUVA.
- Hohmann, B. (2010). *Musik und Hörschäden. Informationen für alle die Musik spielen oder hören*. (23 ed.). SUVA.
- Jiang, T.** (1997). Risks of noise-induced hearing loss for physical education teachers [Letter]. *Journal of Occupational and Environmental Medicine*, 39(10), 925-926. <http://www.ncbi.nlm.nih.gov/pubmed/9343756>
- Lebo, C. P., & Oliphant, K. P. (1968). *Music as a Source of Acoustic Trauma*. Institute of Medical Sciences, Pacific Medical Center, Department of Otolaryngology, University of California Medical School.
- McIlvaine, D., Stewart, M., & Anderson, R.** (2012). Noise exposure levels for musicians during rehearsal and performance times. *Medical Problems of Performing Artists*, 27(1), 31-36.

- Mirbod, S. M., Inaba, R., Yoshida, H., Nagata, C., & Komura, Y.** (1992). Noise exposure level while operating electronic arcade games as a leisure time activity. *Industrial Health*, 30, 65–76.
- Opperman, D. A., Reifman, W., Schlauch, R., & Levine, S.** (2006). Incidence of spontaneous hearing threshold shifts during modern concert performances. *Otolaryngology Head and Neck Surgery*, 134(4), 667-673. <https://doi.org/10.1016/j.otohns.2005.11.039>
- Plakke, B. L.** (1983). Noise levels of electronic arcade games: a potential hearing hazard to children. *Ear and Hearing*, 4(4), 202-203.
- Swanepoel, D. W., & Hall, J. W.** (2010). Football match spectator sound exposure and effect on hearing: a pretest - post-test study. *South African Medical Journal*, 100(4), 239-242.
- Twardella, D., Wellhoefer, A., Brix, J., & Fromme, H.** (2008). High sound pressure levels in Bavarian discotheques remain after introduction of voluntary agreements. *Noise Health*, 10(41), 99-104.  
[http://www.ncbi.nlm.nih.gov/entrez/query.fcgi?cmd=Retrieve&db=PubMed&dopt=Citation&list\\_uids=19075456](http://www.ncbi.nlm.nih.gov/entrez/query.fcgi?cmd=Retrieve&db=PubMed&dopt=Citation&list_uids=19075456)
- Warszawa, A., & Sataloff, R.** (2010). Noise exposure in movie theaters: A preliminary study of sound levels during the showing of 25 films. *Ear, Nose & Throat Journal*, 88, 444–451.
