# Supplementary material
Source: publisher figshare collection journal article supplement (https://asha.figshare.com/articles/dataset/_/19233462)
Supplement: Supplementary file 2 [file 1]

**Supplemental Material S1.** Mean sound pressure levels (SPLs) at the ear of the player.

| <b>Instrument</b> | <b>Source</b>   | <b>SPL in dB(A)</b>               |
|-------------------|-----------------|-----------------------------------|
| Accordion         | (estimated)     | 85 dB(A)                          |
| Bass              | (Hohmann, 2010) | 81 dB(A)                          |
| Viola             | (Hohmann, 2010) | 90 dB(A) (like violin)            |
| Cello             | (Hohmann, 2010) | 84 dB(A)                          |
| Electric bass     | (Hohmann, 2010) | 90 dB(A)                          |
| Electric guitar   | (Hohmann, 2010) | 90 dB(A)                          |
| Euphonium         | (Hohmann, 2010) | 93 dB(A) (Like tuba/trumpet)      |
| Bassoon           | (Hohmann, 2010) | 87 dB(A)                          |
| Recorder          | (Hohmann, 2000) | 86 dB(A)                          |
| Guitar            | (SuvaPro, 2009) | 80 dB(A)                          |
| Dulcimer          | (SuvaPro, 2009) | 80 dB(A) (like string instrument) |
| Bugle             | (Hohmann, 2010) | 93 dB(A)                          |
| Keyboard          | (Hohmann, 2000) | 90 dB(A)                          |
| Clarinet          | (Hohmann, 2010) | 92 dB(A)                          |
| Piano             | (Hohmann, 2000) | 80 dB(A)                          |

|            |                 |                                   |
|------------|-----------------|-----------------------------------|
| Oboe       | (Hohmann, 2010) | 85 dB(A)                          |
| Trombone   | (Hohmann, 2010) | 96 dB(A)                          |
| Flute      | (Hohmann, 2010) | 91 dB(A)                          |
| Saxophone  | (Hohmann, 2000) | 95 dB(A)                          |
| Drums      | (Hohmann, 2010) | 93 dB(A)                          |
| Singing    | (Hohmann, 2010) | 85 dB(A)                          |
| Percussion | (Hohmann, 2000) | 95 dB(A)                          |
| Trumpet    | (Hohmann, 2010) | 93 dB(A)                          |
| Tuba       | (Hohmann, 2010) | 93 dB(A)                          |
| Ukulele    | (SuvaPro, 2009) | 80 dB(A) (like string instrument) |
| Violin     | (Hohmann, 2010) | 90 dB(A)                          |
| Xylophone  | (Hohmann, 2000) | 80 dB(A) (like piano)             |
| Zither     | (SuvaPro, 2009) | 80 dB(A) (like string instrument) |
| Banjo      | (SuvaPro, 2009) | 80 dB(A) (like string instrument) |
| Didgeridoo | (estimated)     | 80 dB(A)                          |
| Harmonica  | (estimated)     | 85 dB(A)                          |
| Orchestra  | (Hohmann, 2000) | 90 dB(A)                          |

|             |                 |                      |
|-------------|-----------------|----------------------|
| Organ       | (Hohmann, 2000) | 80 dB(A)             |
| French horn | (Hohmann, 2010) | 93 dB(A) (like horn) |

## References

Hohmann, B. (2000). *Musik und Hörschäden* (24 ed.). Luzern: SUVA.

Hohmann, B. (2010). *Musik und Hörschäden. Informationen für alle die Musik spielen oder hören.* (23 ed.). Luzern, Switzerland: SUVA.

SuvaPro. (2009). *Wie bitte? Unterrichtspaket zu Lärm und Hörschäden.* Retrieved from [http://www.pro-audito.ch/fileadmin/user\\_upload/Dokumente\\_Dachverband/Suva\\_Wie\\_bitte.pdf](http://www.pro-audito.ch/fileadmin/user_upload/Dokumente_Dachverband/Suva_Wie_bitte.pdf)
